# Supplementary material
Source: PubMed Central journal article supplement (PMC3255512)
Supplement: Supp_Data.pdf [file Supp_Data.pdf]

## SUPPLEMENTARY DATA

SUPPLEMENTARY TABLE S1. DOMINANT, RECESSIVE, AND ADDITIVE MODELS FOR THE FAMILY-BASED ASSOCIATION ANALYSIS OF ASTHMA AND RELATED TRAITS WITH *SPP1* POLYMORPHISMS IN PUERTO RICAN ASTHMA TRIOS

| <i>Phenotype</i>                      | <i>Model</i> | <i>rs4660</i> | <i>rs6812524</i> | <i>rs7435825</i> | <i>rs1126772</i> | <i>rs1126616</i> |
|---------------------------------------|--------------|---------------|------------------|------------------|------------------|------------------|
| Asthma                                | Additive     | 0.42          | 0.52             | 0.47             | 0.21             | <b>0.003</b>     |
|                                       | Dominant     | 0.46          | 0.5              | 0.51             | <b>0.04</b>      | <b>0.000065</b>  |
|                                       | Recessive    | —             | —                | —                | 0.19             | 0.66             |
| Moderate-severe asthma                | Additive     | 0.43          | 0.56             | 0.41             | 0.75             | <b>0.01</b>      |
|                                       | Dominant     | 0.48          | 0.54             | 0.54             | 0.34             | <b>0.00037</b>   |
|                                       | Recessive    | —             | —                | —                | 0.34             | 0.16             |
| Asthma with elevated IgE (>100 IU/mL) | Additive     | 0.83          | 0.78             | 0.52             | 0.08             | <b>0.002</b>     |
|                                       | Dominant     | 0.75          | 0.82             | 0.73             | <b>0.02</b>      | <b>0.000084</b>  |
|                                       | Recessive    | —             | —                | —                | 0.498            | 0.89             |
| Post-BD FEV <sub>1</sub>              | Additive     | 0.98          | 0.44             | 0.33             | 0.37             | 0.10             |
|                                       | Dominant     | 0.46          | 0.29             | 0.32             | 0.07             | <b>0.02</b>      |
|                                       | Recessive    | —             | —                | —                | 0.21             | 0.55             |
| Log <sub>10</sub> IgE level           | Additive     | 0.29          | 0.38             | 0.69             | 0.24             | 0.26             |
|                                       | Dominant     | 0.28          | 0.41             | 0.72             | 0.14             | 0.18             |
|                                       | Recessive    | —             | —                | —                | 0.66             | 0.98             |

*P* values <0.05 are in bold. For 3 SNPs, the minor allele frequency was sufficiently rare that the recessive model had insufficient informative families to perform the analysis.

IgE, immunoglobulin E; Post-BD, post-bronchodilator lung function; SNP, single-nucleotide polymorphism.
